# Supplementary material for: Zinc(II) Iminopyridine Complexes as Antibacterial Agents: A Structure-to-Activity Study
Source: MDPI journal article supplement (doi:10.3390/ijms25074011), 2024-04-04
Supplement: s1 [file s1]

SUPPLEMENTARY INFORMATION

## Zinc(II) Iminopyridine Complexes as Antibacterial Agents: A Structure-to-Activity Study

Silvia de la Mata Moratilla <sup>1</sup>, Sandra Casado Angulo <sup>1</sup>, Natalia Gómez-Casanova <sup>2</sup>, José Luis Copa-Patiño <sup>2</sup>, Irene Heredero-Bermejo <sup>2,\*</sup>, Francisco Javier de la Mata <sup>1,3,4</sup> and Sandra García-Gallego <sup>1,3,4,\*</sup>

<sup>1</sup> University of Alcalá, Faculty of Sciences, Department of Organic and Inorganic Chemistry and Research Institute in Chemistry “Andrés M. del Río” (IQAR), 28805 Alcalá de Henares, Spain; silvia.matam@edu.uah.es (S.d.l.M.M.); sandra.casado@edu.uah.es (S.C.A.); javier.delamata@uah.es (F.J.d.l.M.)

<sup>2</sup> University of Alcalá, Faculty of Pharmacy, Department of Biomedicine and Biotechnology, 28805 Alcalá de Henares, Spain; natalia.gomezc@uah.es (N.G.-C.); josel.copa@uah.es (J.L.C.-P.)

<sup>3</sup> Networking Research Center on Bioengineering, Biomaterials and Nanomedicine (CIBER-BBN), 28029 Madrid, Spain

<sup>4</sup> Institute Ramón y Cajal for Health Research (IRYCIS), 28034 Madrid, Spain

\* Correspondence: irene.heredero@uah.es (I.H.-B.); sandra.garciagallego@uah.es (S.G.-G.)

### Table of Contents

|                                                                                                                    |   |
|--------------------------------------------------------------------------------------------------------------------|---|
| Figure S1. <sup>13</sup> C-NMR spectra of compounds <b>Ia</b> , <b>Ib</b> and <b>Ic</b> in CDCl <sub>3</sub> ..... | 2 |
| Figures S2-4. FTIR of compounds <b>Ia</b> , <b>Ib</b> and <b>Ic</b> , and precursors.....                          | 3 |
| Figures S5-7. TGA of compounds <b>Ia</b> , <b>Ib</b> , <b>Ic</b> and <b>I</b> .....                                | 6 |
| Figures S8-10. Stability study in water of compounds <b>Ia</b> , <b>Ib</b> and <b>Ic</b> at t=0 and t=7 days.....  | 7 |
| Figure S11. HRMS study of compounds <b>Ia</b> , <b>Ib</b> and <b>Ic</b> .....                                      | 9 |

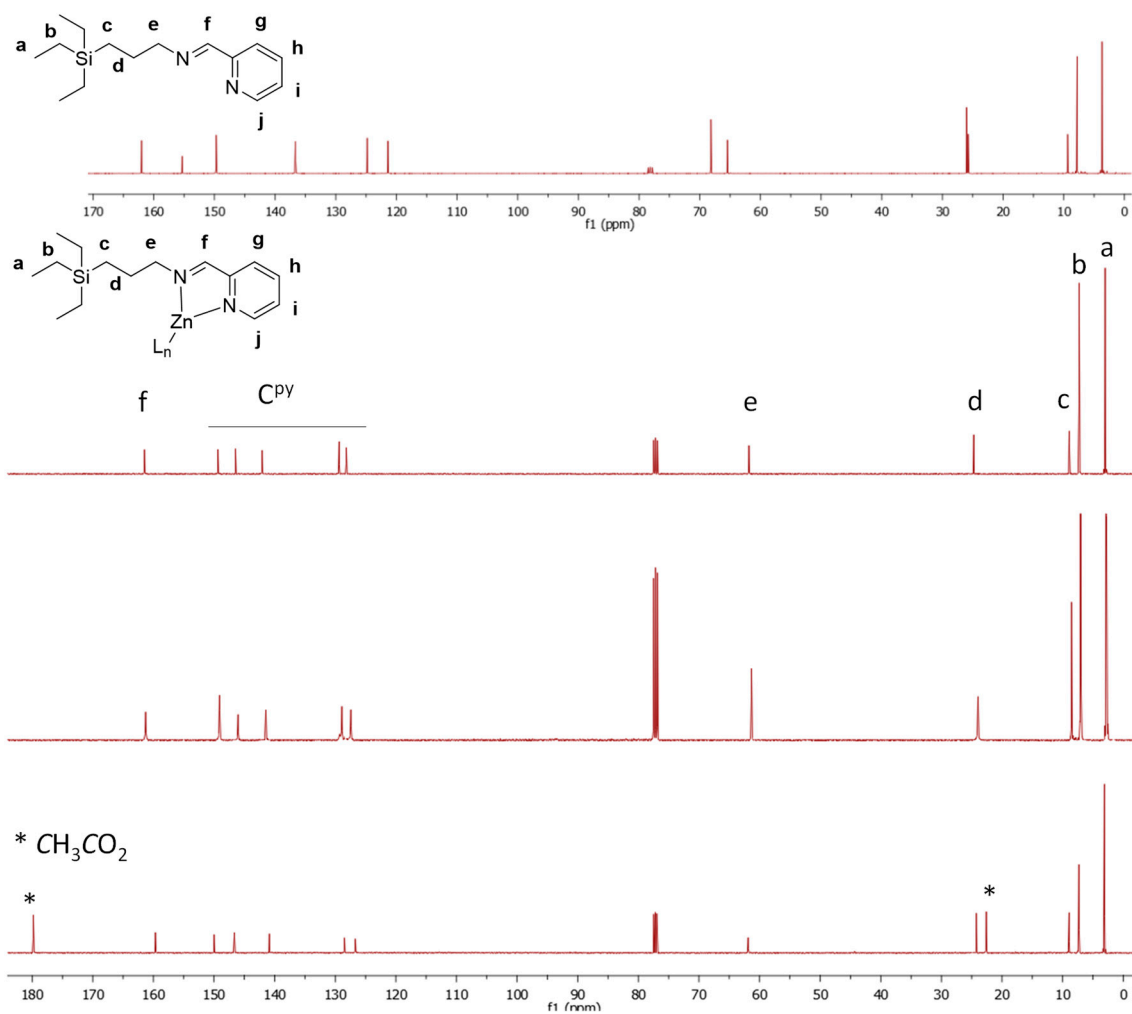

**Figure S1.**  $^{13}\text{C}$ -NMR spectra of compounds **I**, **Ia**, **Ib** and **Ic** (from top to bottom) in  $\text{CDCl}_3$ .

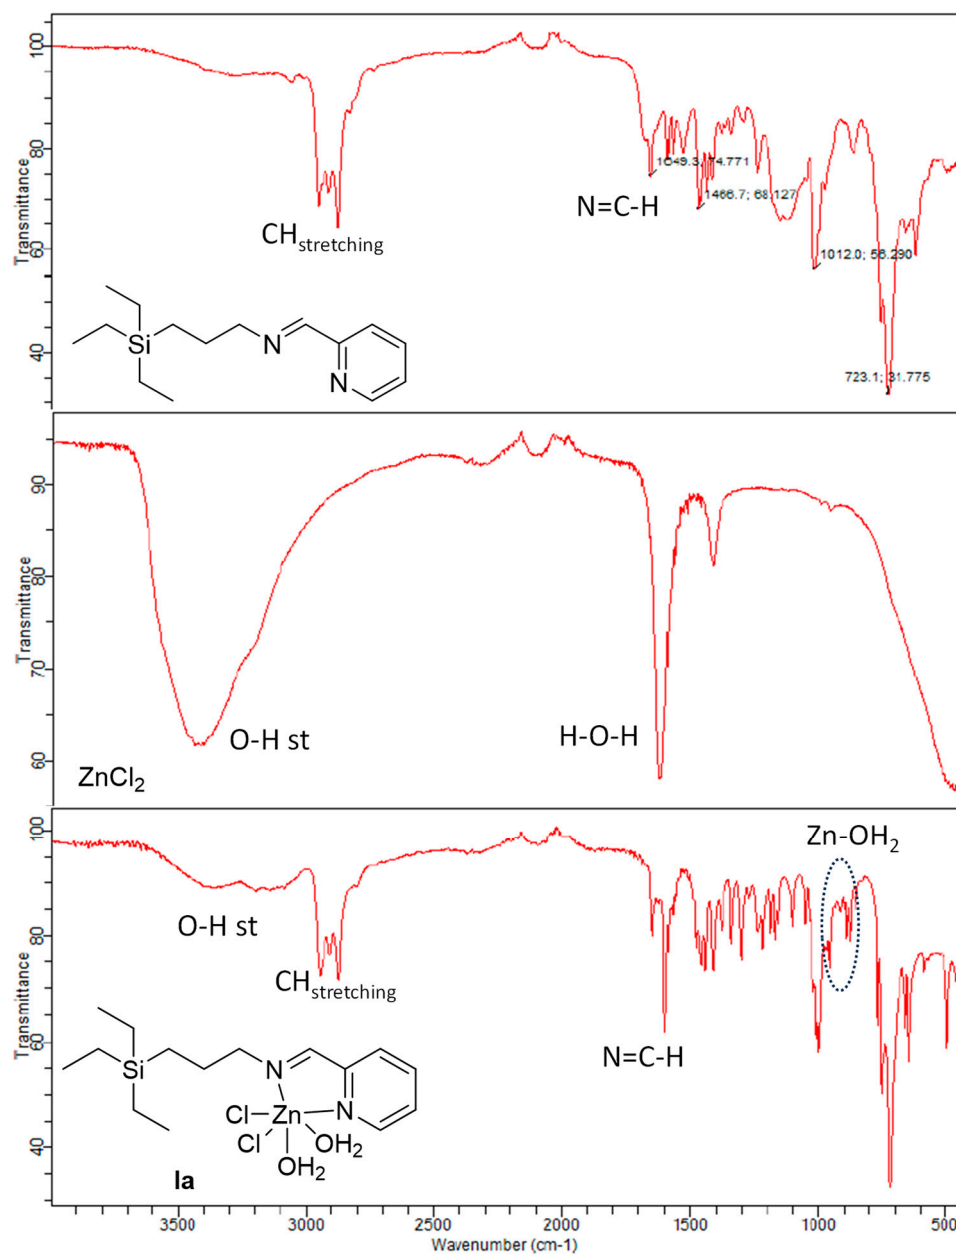

**Figure S2.** FTIR of compound **I** (top),  $\text{ZnCl}_2$  (middle) and **Ia** (bottom).

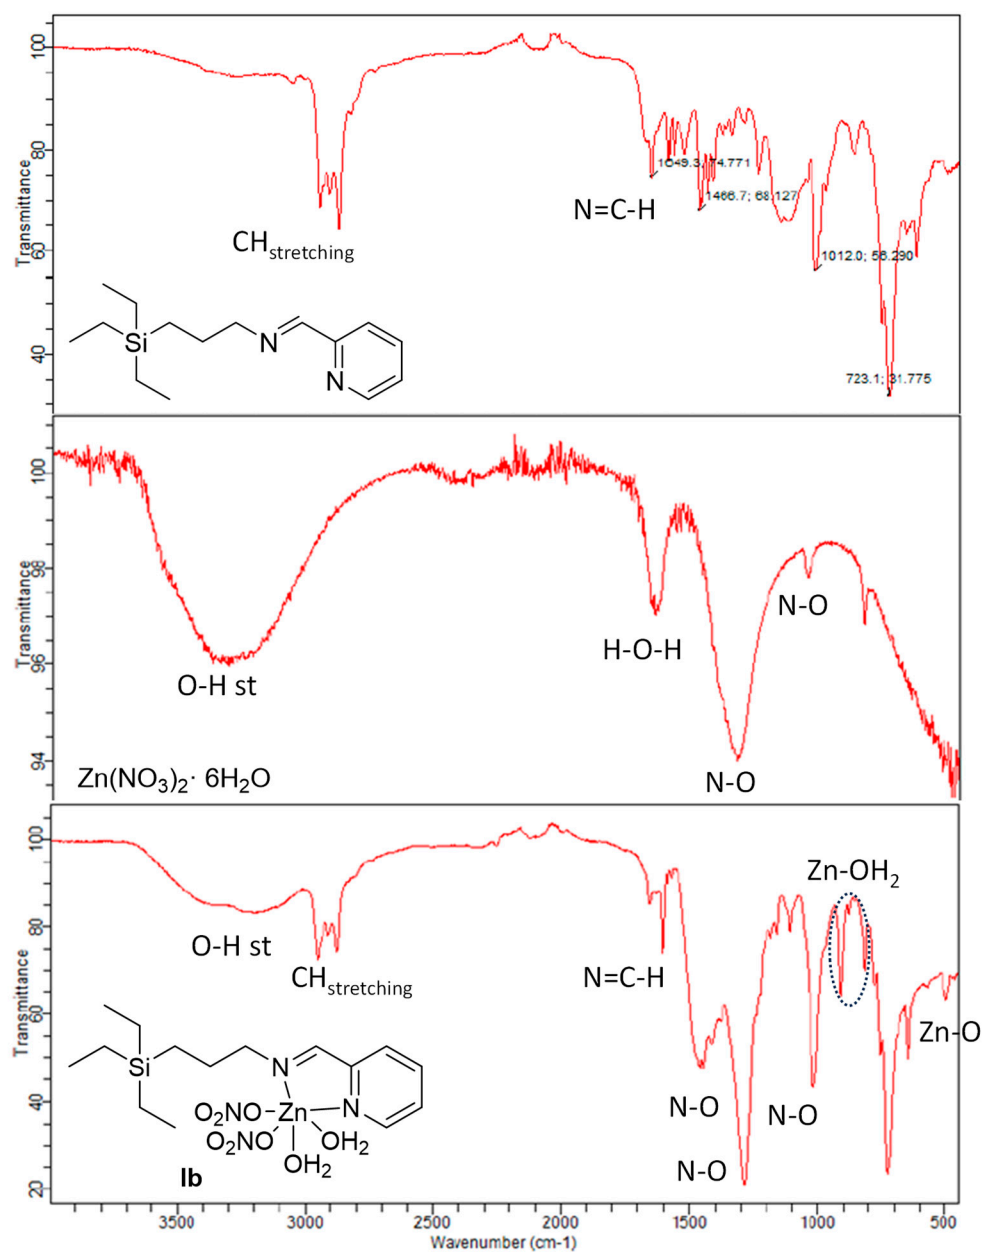

**Figure S3.** FTIR of compound **I** (top),  $\text{Zn}(\text{NO}_3)_2 \cdot 6\text{H}_2\text{O}$  (middle) and **Ib** (bottom).

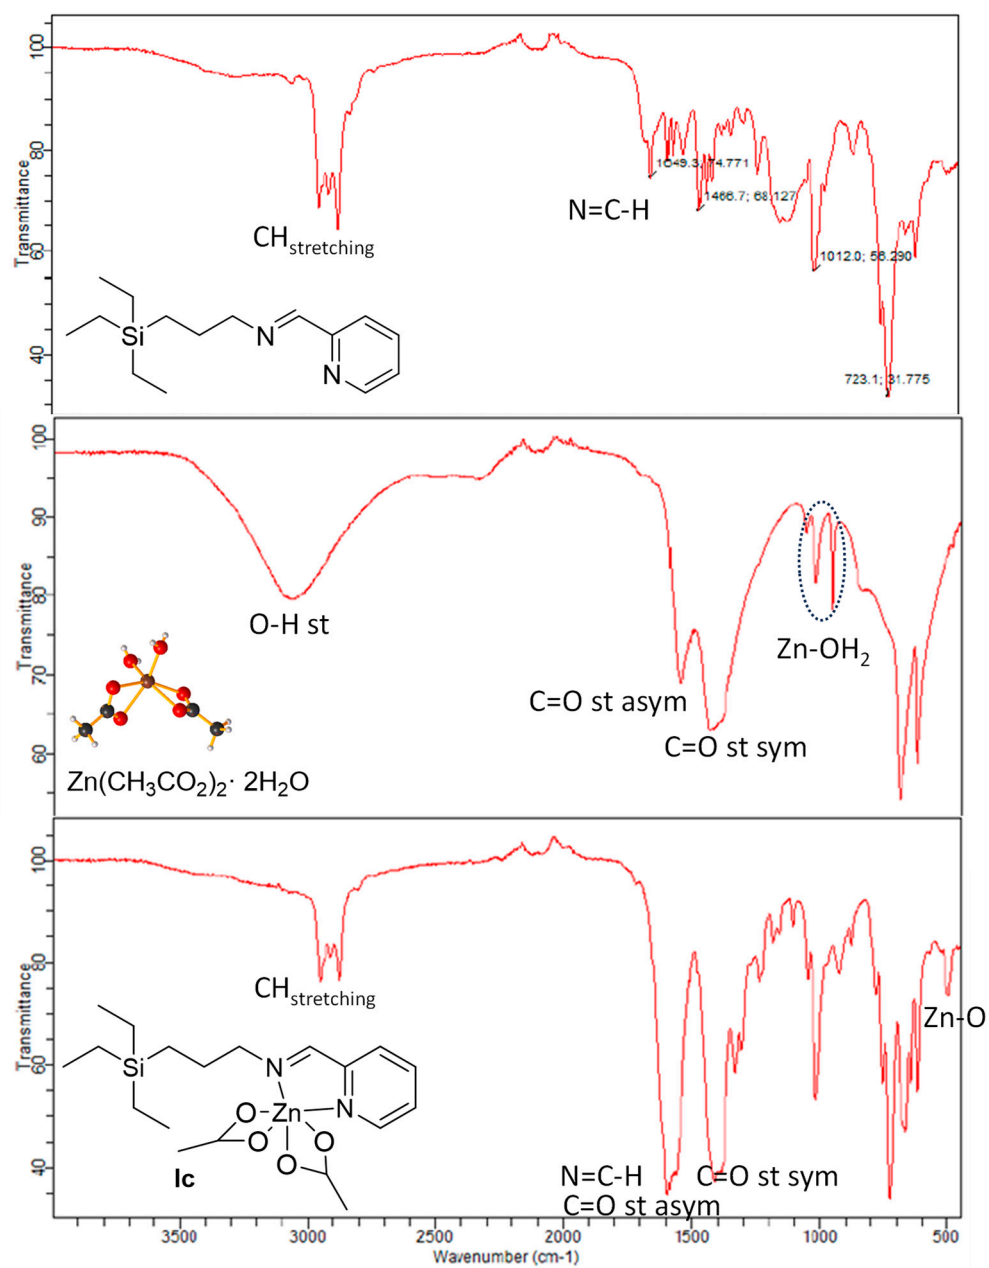

**Figure S4.** FTIR of compound **I** (top), Zn(acet)<sub>2</sub>·2H<sub>2</sub>O (middle) and **Ic** (bottom).

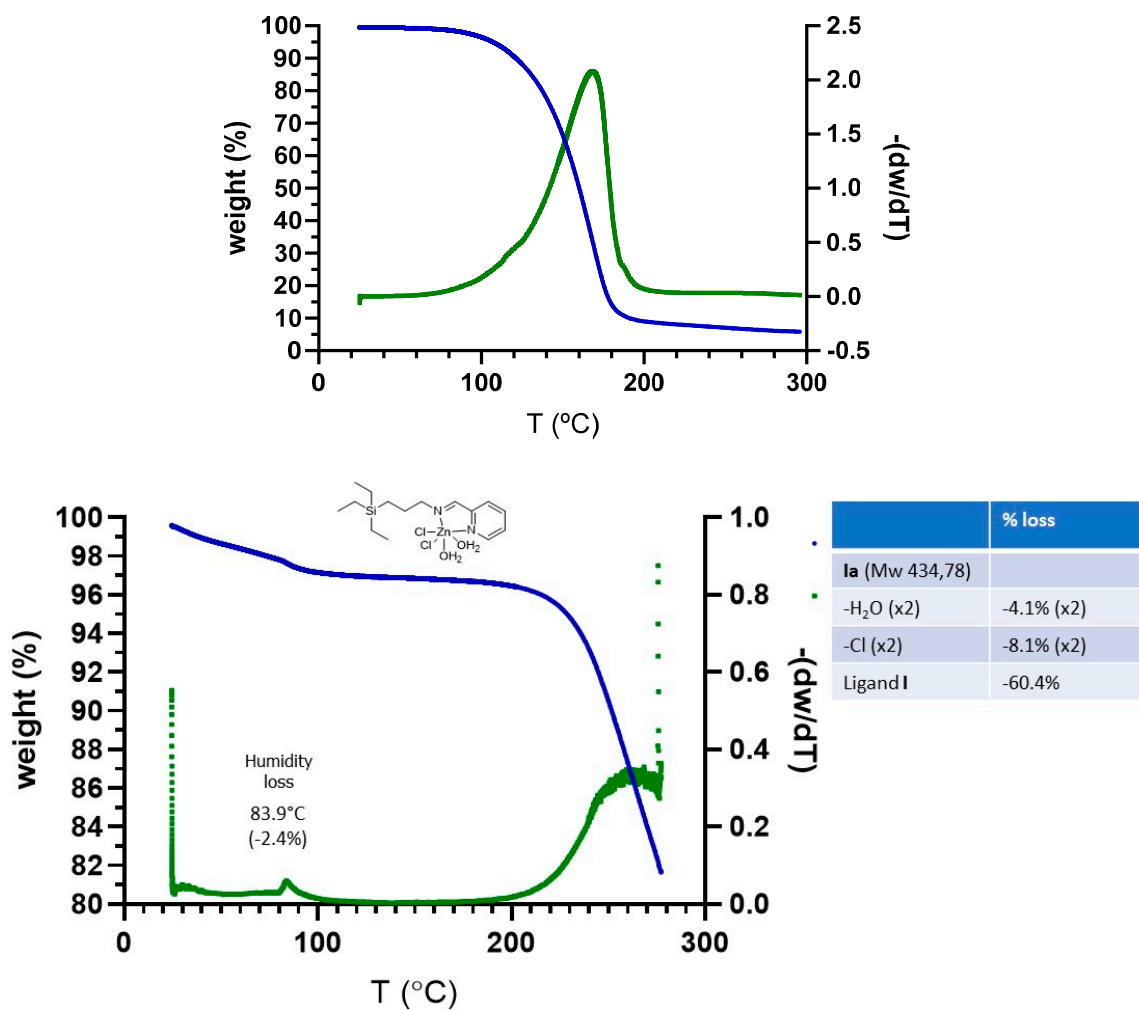

Figure S5. Comparative TGA curves of compound I (top) and Ia (bottom), including table with predicted decomposition steps.

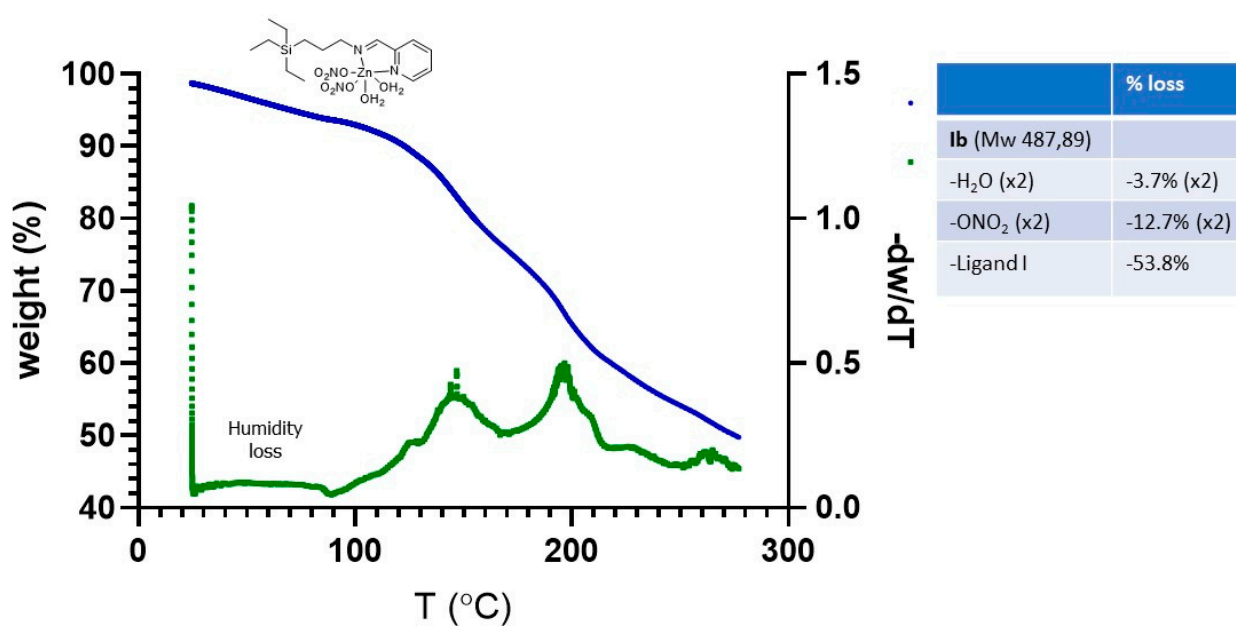

Figure S6. TGA of compound Ib, including table with predicted decomposition steps.

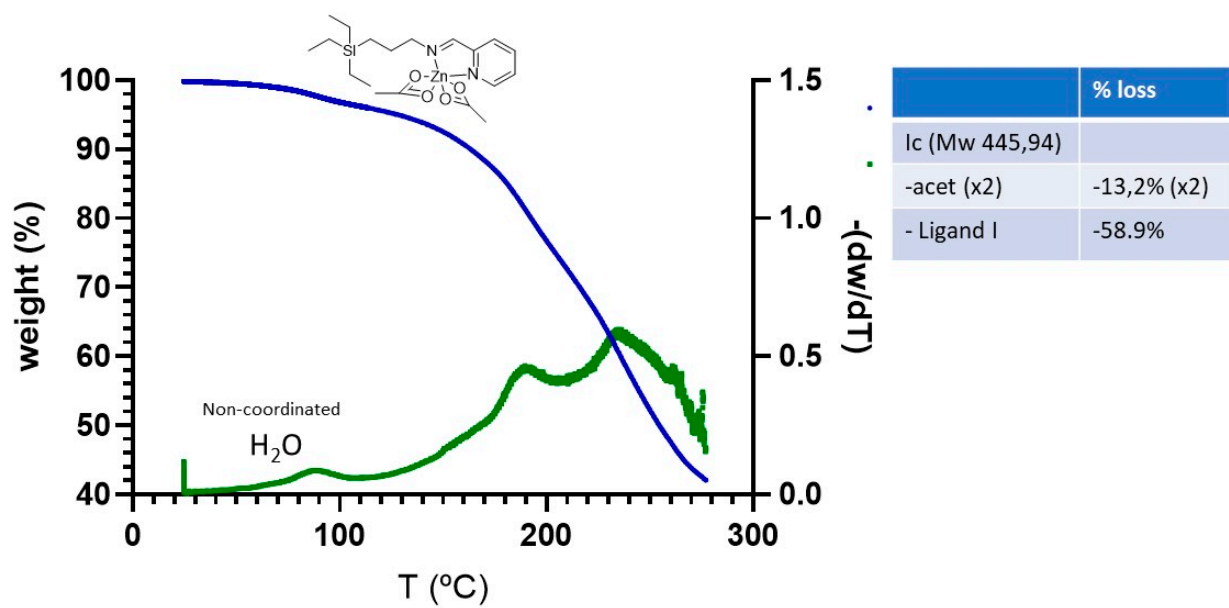

**Figure S7.** TGA of compound **Ic**, including table with predicted decomposition steps.

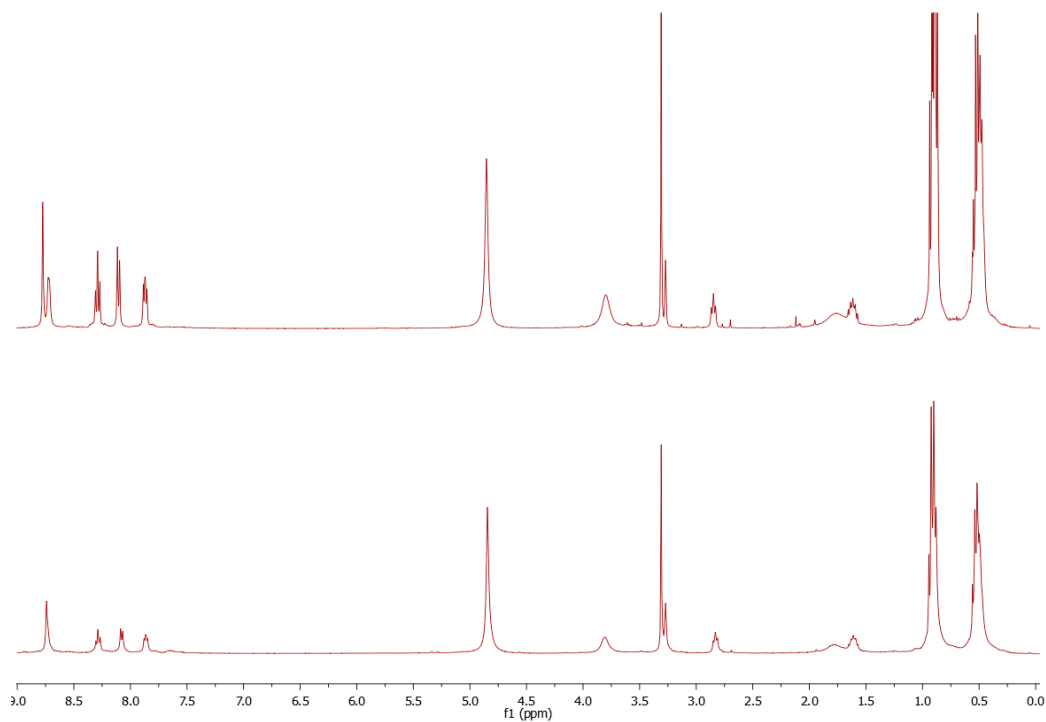

**Figure S8.** <sup>1</sup>H-NMR spectra of compound **Ia** at  $t=0$  (top) and  $t=7$  days (bottom) in MeOD.

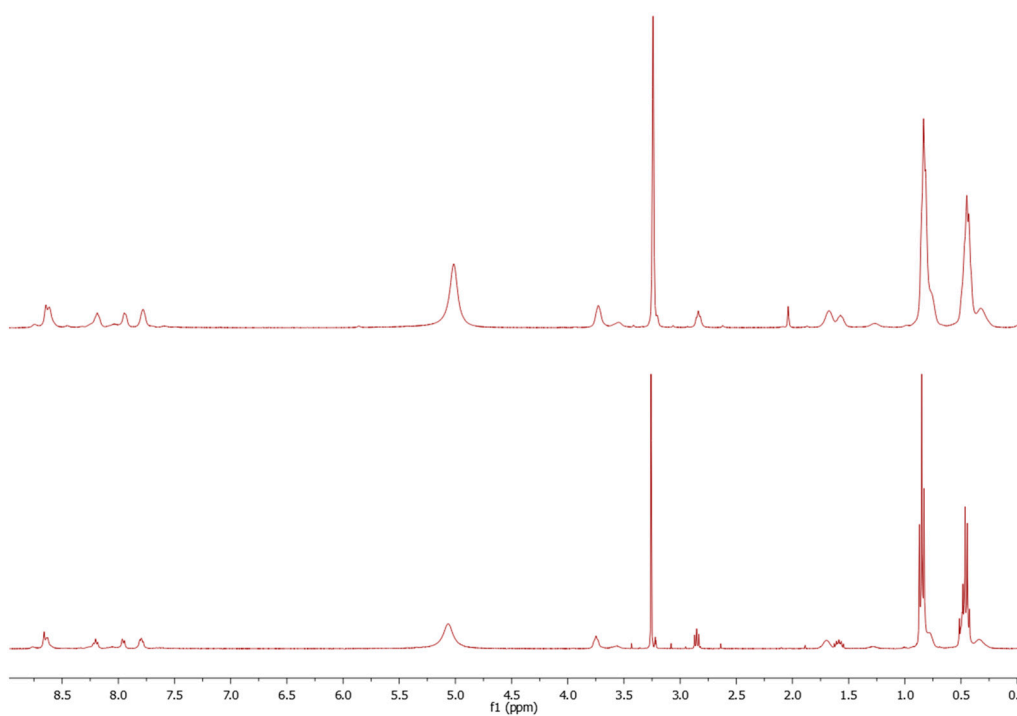

**Figure S9.**  $^1\text{H}$ -NMR spectra of compound **Ib** at  $t=0$  (top) and  $t=7\text{days}$  (bottom) in MeOD.

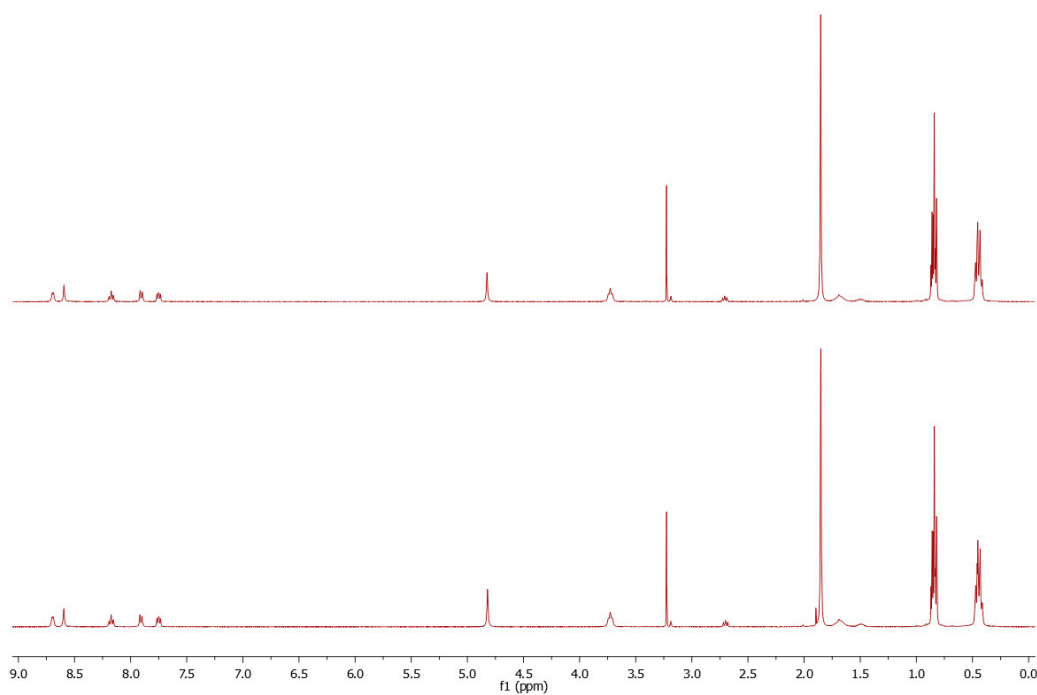

**Figure S10.**  $^1\text{H}$ -NMR spectra of compound **Ic** at  $t=0$  (top) and  $t=7\text{days}$  (bottom) in MeOD.



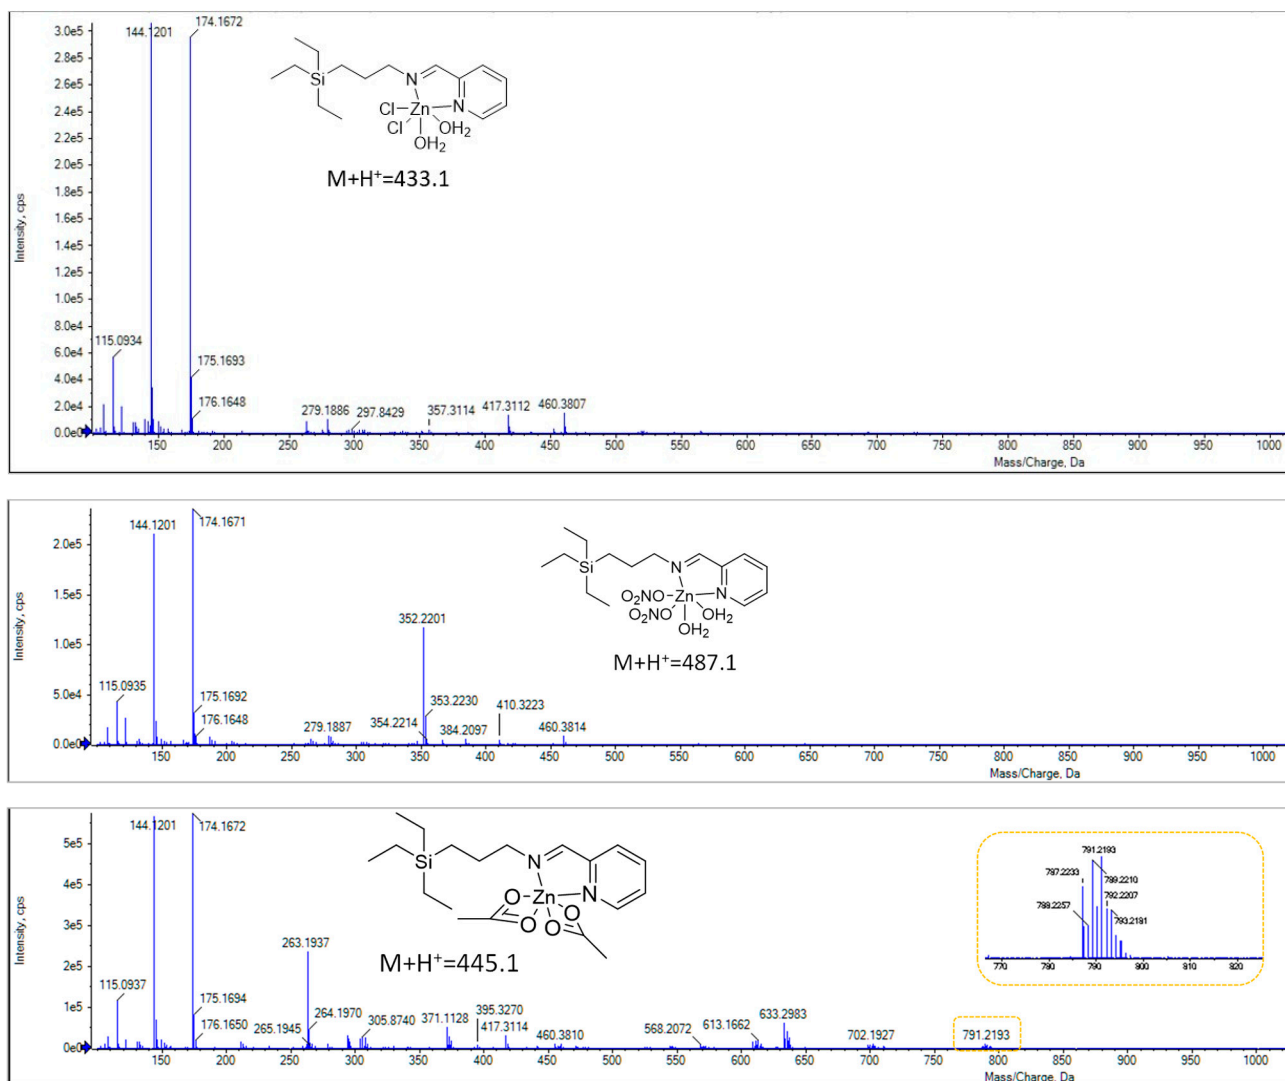

Figure S11. HRMS spectra of compounds Ia, Ib and Ic.
